# Supplementary material for: Fabrication of Electrospun Cellulose Acetate/Nanoclay Composites for Pollutant Removal
Source: MDPI journal article supplement (doi:10.3390/polym14235070), 2022-11-22
Supplement: s1 [file s1]

Supplementary data

# Fabrication of electrospun cellulose acetate/nanoclays composites for pollutants removal

Petya Tsekova and Olya Stoilova\*

Laboratory of Bioactive Polymers, Institute of Polymers, Bulgarian Academy of Sciences, Akad. G. Bonchev St, bl. 103A, 1113 Sofia, Bulgaria; stoilova@polymer.bas.bg

\* Correspondence: [stoilova@polymer.bas.bg](mailto:stoilova@polymer.bas.bg)

Received: 13 November 2022 ; Accepted: 21 November 2022; Published: 22 November 2022

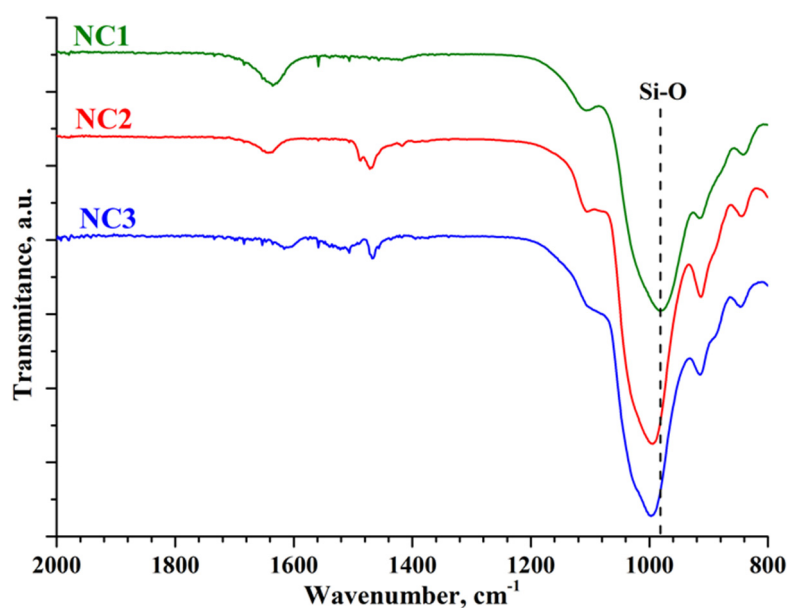

Figure S1. ATR-FTIR spectra of pristine NC1, NC2 and NC3 nanoclays.

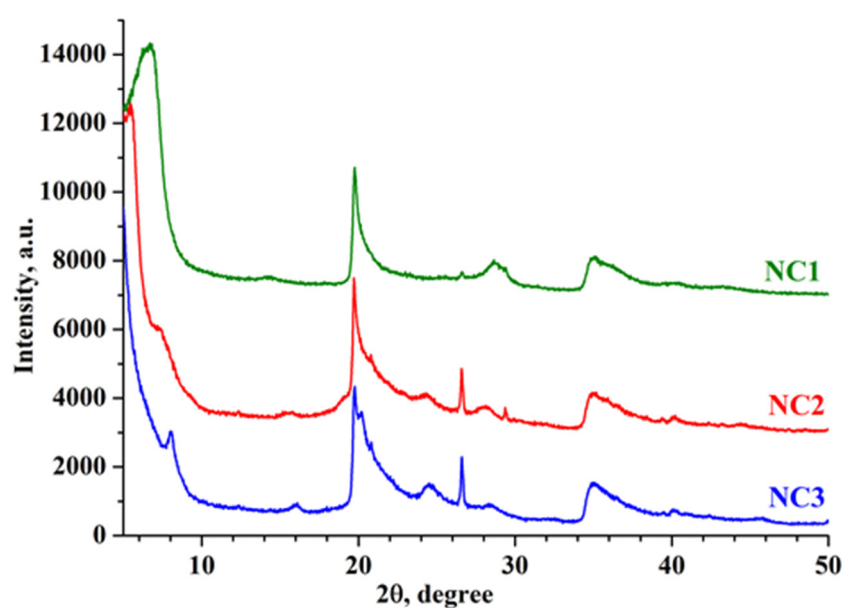

Figure S2. XRD patterns of pristine NC1, NC2 and NC3 nanoclays.
